# Supplementary material for: Au NPs–Ni(OH)2–Cu nanocomposites enhanced electrochemical properties for detection of H2O2
Source: Royal Society of Chemistry journal article supplement (doi:10.1039/c2ay05534a), 2012-01-01
Supplement: c2ay05534a.pdf [file c2ay05534a.pdf]

## Support Information

### Au NPs-Ni(OH)<sub>2</sub>-Cu Nanocomposites Enhanced Electrochemical Properties for Detection of H<sub>2</sub>O<sub>2</sub>

Xiaojun Zhang<sup>a,\*</sup>, Yan Huang<sup>a</sup>, Liutao Yu<sup>a</sup>, Guangfeng Wang<sup>a,b</sup>, Bin Fang<sup>a</sup>

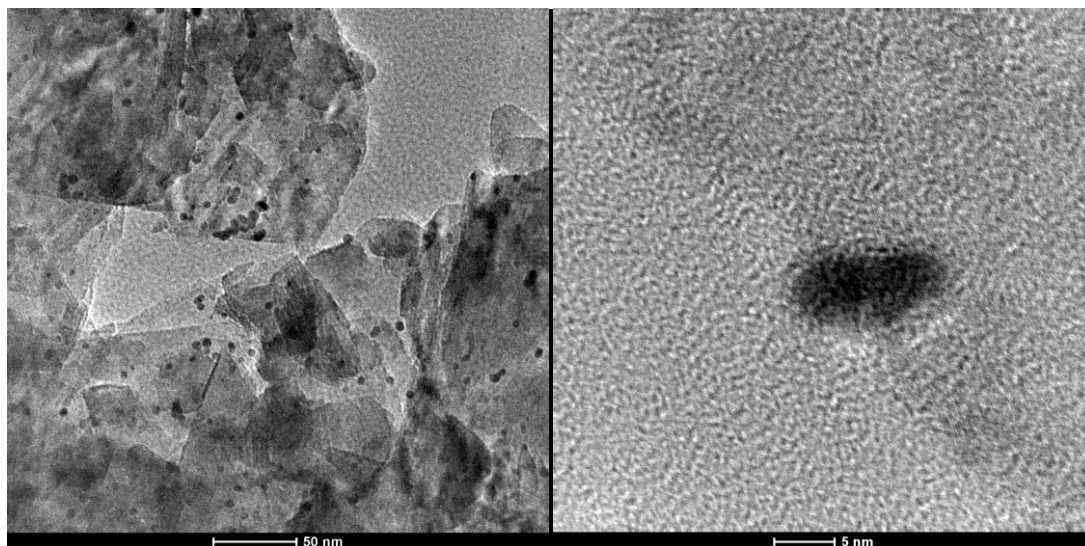

**Figure S1** TEM images of Au NPs-Ni(OH)<sub>2</sub>-Cu nanocomposites

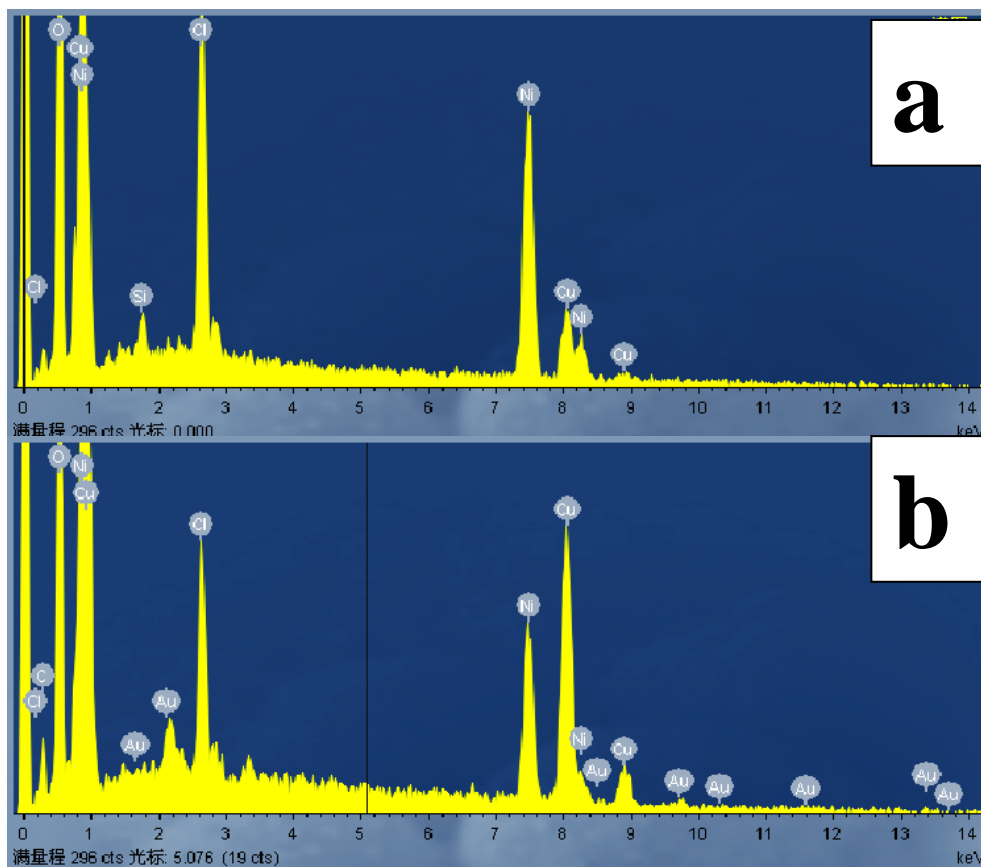

**Figure S2** EDS images of Ni(OH)<sub>2</sub>-Cu nanocomposite (a) and Au NPs- Ni(OH)<sub>2</sub>-Cu nanocomposite (b).

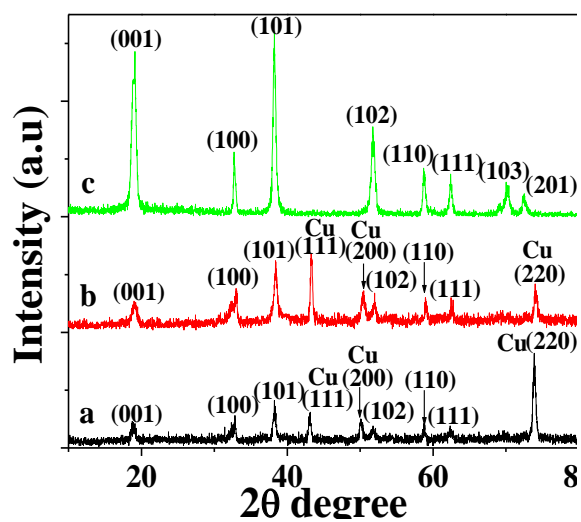

**Figure S3** XRD pattern of Ni(OH)<sub>2</sub>-Cu nanocomposite (a), Au NPs-Ni(OH)<sub>2</sub>-Cu nanocomposite (b) and Ni(OH)<sub>2</sub> nanoplates (c).

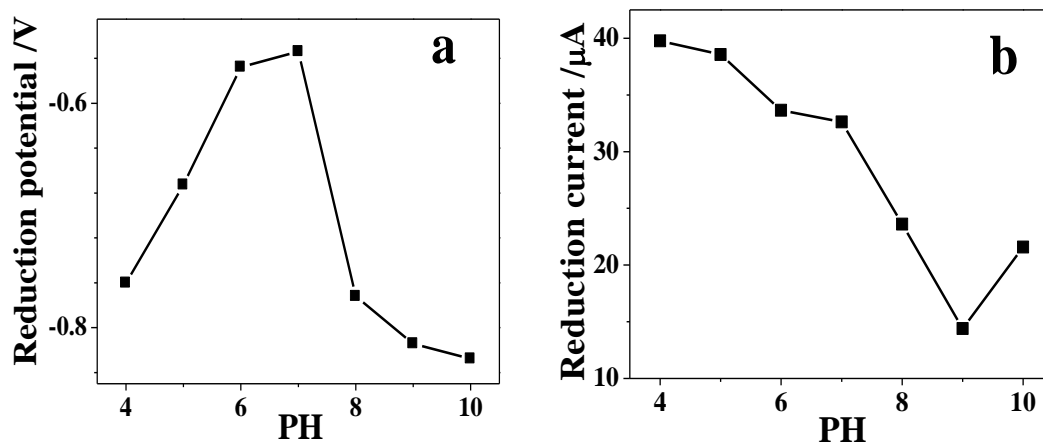

**Figure S4** Plots of the oxidation potential (a) and oxidation current (b) of 0.5 mM H<sub>2</sub>O<sub>2</sub> at the Au NPs–Ni(OH)<sub>2</sub>–Cu/GCE at different pH values (4.0–10.0). The scan rate was 100 mVs<sup>-1</sup>
